# Supplementary material
Source: PubMed Central journal article supplement (PMC3568559)
Supplement: AEM.02920-12_zam999104080so1.pdf [file AEM.02920-12_zam999104080so1.pdf]

1

## Supplemental Material

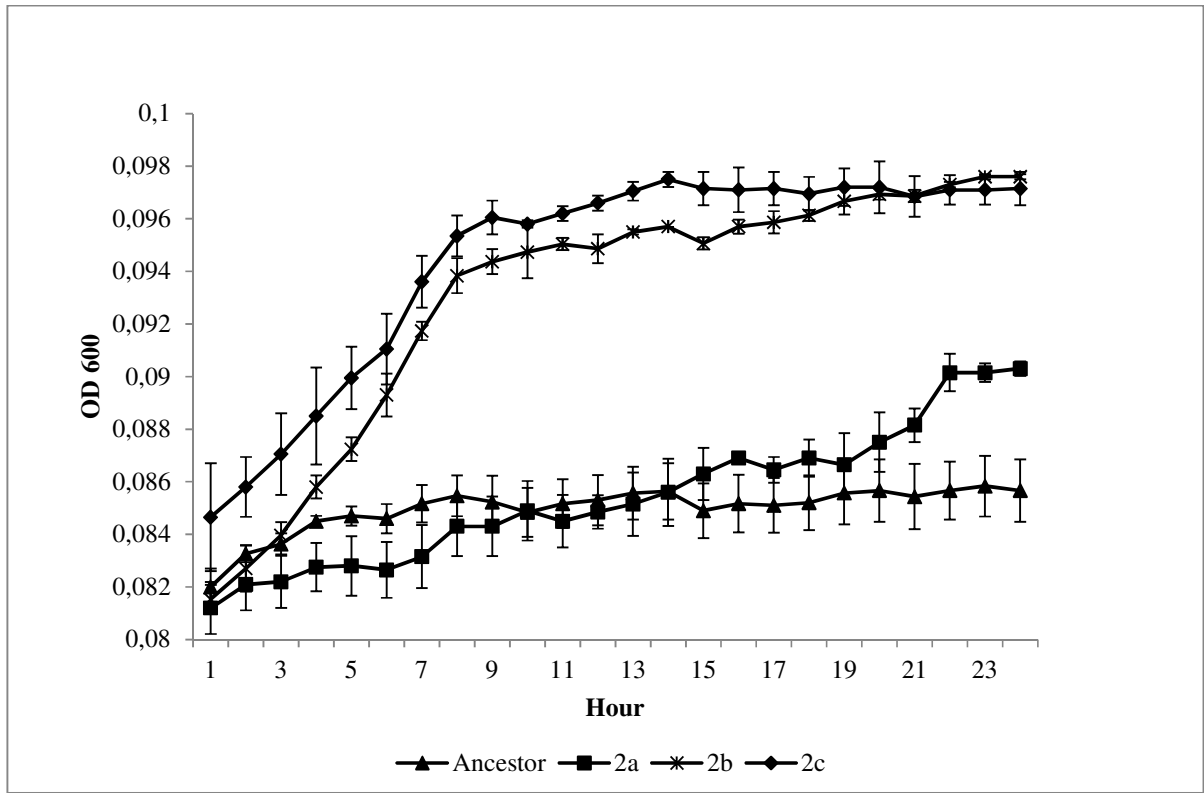

2

3 **Figure S1.** Growth in M9 minimal medium with 0.4% of D- galactose as sole carbon source.

4 The graph shows the OD600 values obtained by population 2 forms and the ancestor (growing  
5 separately) under oxygen constant conditions (treatment A) during 24h.

6

7

8

9

10

**Table S1.** Changes in intergenic regions consistent to all colony types

| <b>Intergenic region</b> | <b>Change in nucleotide</b> | <b>Position in the genome</b> | <b>Gene position</b> |
|--------------------------|-----------------------------|-------------------------------|----------------------|
| cra/mraZ                 | C→A                         | 89089                         | +57/-545             |
|                          | G→C                         | 89103                         | +71/-531             |
|                          | A→G                         | 89143                         | +111/-491            |
|                          | G→T                         | 89145                         | +113/-489            |
|                          | G→A                         | 89239                         | +207/-395            |
|                          | C→A                         | 89241                         | +209/-393            |
|                          | A→G                         | 89263                         | +231/-371            |
|                          | T→C                         | 89316                         | +284/-318            |
|                          | A→G                         | 89321                         | +289/-313            |
|                          | T→G                         | 89471                         | +439/-163            |
|                          | A→C                         | 89570                         | +538/-64             |
| purE/lpxH                | G→A                         | 552384                        | -61/+57              |
| csgC/ymdA                | C→A                         | 1104604                       | +88/-33              |
| treA/dhaM                | G→A                         | 1246725                       | -126/+194            |
| ftnB/yecJ                | C→A                         | 1985523                       | +71/+8               |
| argZ/argY                | T→A                         | 2816213                       | -56/+7               |
| iap/ygbF                 | C→T                         | 2876099                       | +459/+492            |
| queF/ygdH                | C→T                         | 2924314                       | +96/-16              |
| speC/yqgA                | +G                          | 3107198                       | -21/-377             |
| yhbX/leuU                | G→A                         | 3319870                       | -235/+224            |
| yigG/rarD                | +C                          | 4001264                       | -48/+47              |
| glyV/glyX                | 2 bp→TT                     | 4390491                       | +33/-3               |
| insD/yjgZ                | T→C                         | 4497684                       | +161/-1599           |

11

12

13

14

15

16

17

18

19

20

**Table S2.** Unique mutations found in each colony type. Small colonies (a) from treatment A (populations 1 and 2) and form 7c from treatment C have the highest number of unique mutations

|    |                                                                                                                                                                                                                                                                                                                                                                                                                                |
|----|--------------------------------------------------------------------------------------------------------------------------------------------------------------------------------------------------------------------------------------------------------------------------------------------------------------------------------------------------------------------------------------------------------------------------------|
| 1a | leuA, proB, ispA, ybbC/seiU, entF, hscC, rhtA, mntR, dacC/deoR, potH, elfG, flgF, ycgB/dadA, trpA, insH/ynaJ, hrpA, aldA, mokB/trg, narZ, flxA/dicC, sppA, yoaE, yegL/ibsA, yehK/yehL, yeiS, yfcM, trxC, kgtP, yfjR, lhgO, hycA/hypA, fucO, xerD, hybE, plsC, insD/yqiH, argG, mlaF/yrbG, tusD, yhfS, xylB, rfaG, ibpB, rnpA, mdtL, rbsA, wzzE, rrsE, metA/aceB, dcuA, yjeM, aidB, ulaE, yjhQ, yjjU.                           |
| 1b | yafE, rrsG/clpB, yqjA.                                                                                                                                                                                                                                                                                                                                                                                                         |
| 1c | ilvD                                                                                                                                                                                                                                                                                                                                                                                                                           |
| 2a | ftsI, lpxC/secM, pdhR/ace, yafJ, ykfA, yahK, ddlA/iraP, ybeF, gsiA, ycaN, ycaL, serX, flgI, cob, adhE, hipB/lsrK, dtpA/gstA, anmK/slyB, lhr, ydiI, btuE, ydiY, xthA, araF/ftnB, yedL/fliE, asnW/yeeO, yees, yegP/yegQ, yehY, yohF/yohP, cdd, yfaQ/yfaT, yfdE, yfeW, yfeY, yfhG/glrK, ffh/ypjD, hycD, prfB, yhaC/garK, agaV/agaS, yhbP/yhbQ, rlmE, sspA, trkA, pabA, yhfT, glpG, livJ, yhjG, bcsB, yiaD, yifB, rnr, insI, hsdS. |
| 2b | yhhZ                                                                                                                                                                                                                                                                                                                                                                                                                           |
| 2c | None -                                                                                                                                                                                                                                                                                                                                                                                                                         |
| 3a | rpmB                                                                                                                                                                                                                                                                                                                                                                                                                           |
| 3b | None -                                                                                                                                                                                                                                                                                                                                                                                                                         |
| 3b | acnA, tnaA/tnaB.                                                                                                                                                                                                                                                                                                                                                                                                               |
| 4a | metQ, ydiM, recG.                                                                                                                                                                                                                                                                                                                                                                                                              |
| 4b | cutC, yfjL/yfjM.                                                                                                                                                                                                                                                                                                                                                                                                               |
| 4c | None -                                                                                                                                                                                                                                                                                                                                                                                                                         |
| 5a | ycjM, ttdA                                                                                                                                                                                                                                                                                                                                                                                                                     |
| 5b | yaeJ, yaeF, prpD.                                                                                                                                                                                                                                                                                                                                                                                                              |
| 5c | malX, asnT/yeeJ, ppiC/rep, gltP/yjcO.                                                                                                                                                                                                                                                                                                                                                                                          |
| 6b | hha, yfgO, nanR/dcuD, ibpA/yidQ.                                                                                                                                                                                                                                                                                                                                                                                               |
| 6c | modA, msbA, ydiJ, cytR.                                                                                                                                                                                                                                                                                                                                                                                                        |
| 7b | mmuM/afuC, cynX, ydhB, [qseB]–[qseC].                                                                                                                                                                                                                                                                                                                                                                                          |
| 7c | aroP/pdhR, betT/yahA, cof, ftsK, ycdU/serX, ynaK/insH, preA, mglA, bcr, nuoH, yfcA, rnlB/yfjP, bglA, hybB, gltF, arsB, rhtC, nrfC, psd, yjhI, yjjI.                                                                                                                                                                                                                                                                            |

21

22
